# Supplementary material
Source: HighWire-hosted journal article supplement (https://openheart.bmj.com/content/5/2/e000821)
Supplement: inline-supplementary-material-1 [file inline-supplementary-material-1.docx]

Table A1. Cardiovascular disease (CVD): included conditions and corresponding International Classification of Disease-10-Australian Modification (ICD-10-AM) codes.

| CVD conditions | ICD10-AM codes |
| --- | --- |
| Myocardial infarction | I210-I214, I219-I221, I228, I229 |
| Unstable angina | I200 |
| Other coronary heart disease | I201, I208, I209, I230-I236, I238, I240, I248, I249, I253-I256, I460, I469 |
| Heart failure | I110, I130, I132, I50, I500, I501, I509 |
| Haemorrhagic stroke | I600-I616, I618, I619 |
| Ischaemic stroke | I630-I636, I638, I639, I64 |
| Transient ischaemic attack | G450-G453, G458-G468 |
| Peripheral vascular disease | E1050-E1052, E1150-E1152, E1451, E1452, I7021-I7024, I7100-I7103, I711, I713, I715, I718, I739-I745, I748, I749, |
| Other CVD related deaths | E1059, E1159, E1459, I250, I2510-I2513, I252, I258, I259, I461 I650-I653, I658-I664, I668-I670, I672, I690, I691, I693, I694, I698, I700, I701, I7020, I708, I709, I714, Z951, Z955, Z958, Z959 |
